# Supplementary material
Source: Springer Nature journal article supplement (https://cannabishub.eu/wp-content/uploads/2026/05/42238_2026_438_MOESM1_ESM.pdf)
Supplement: MOESM1 [file 42238_2026_438_MOESM1_ESM.pdf]

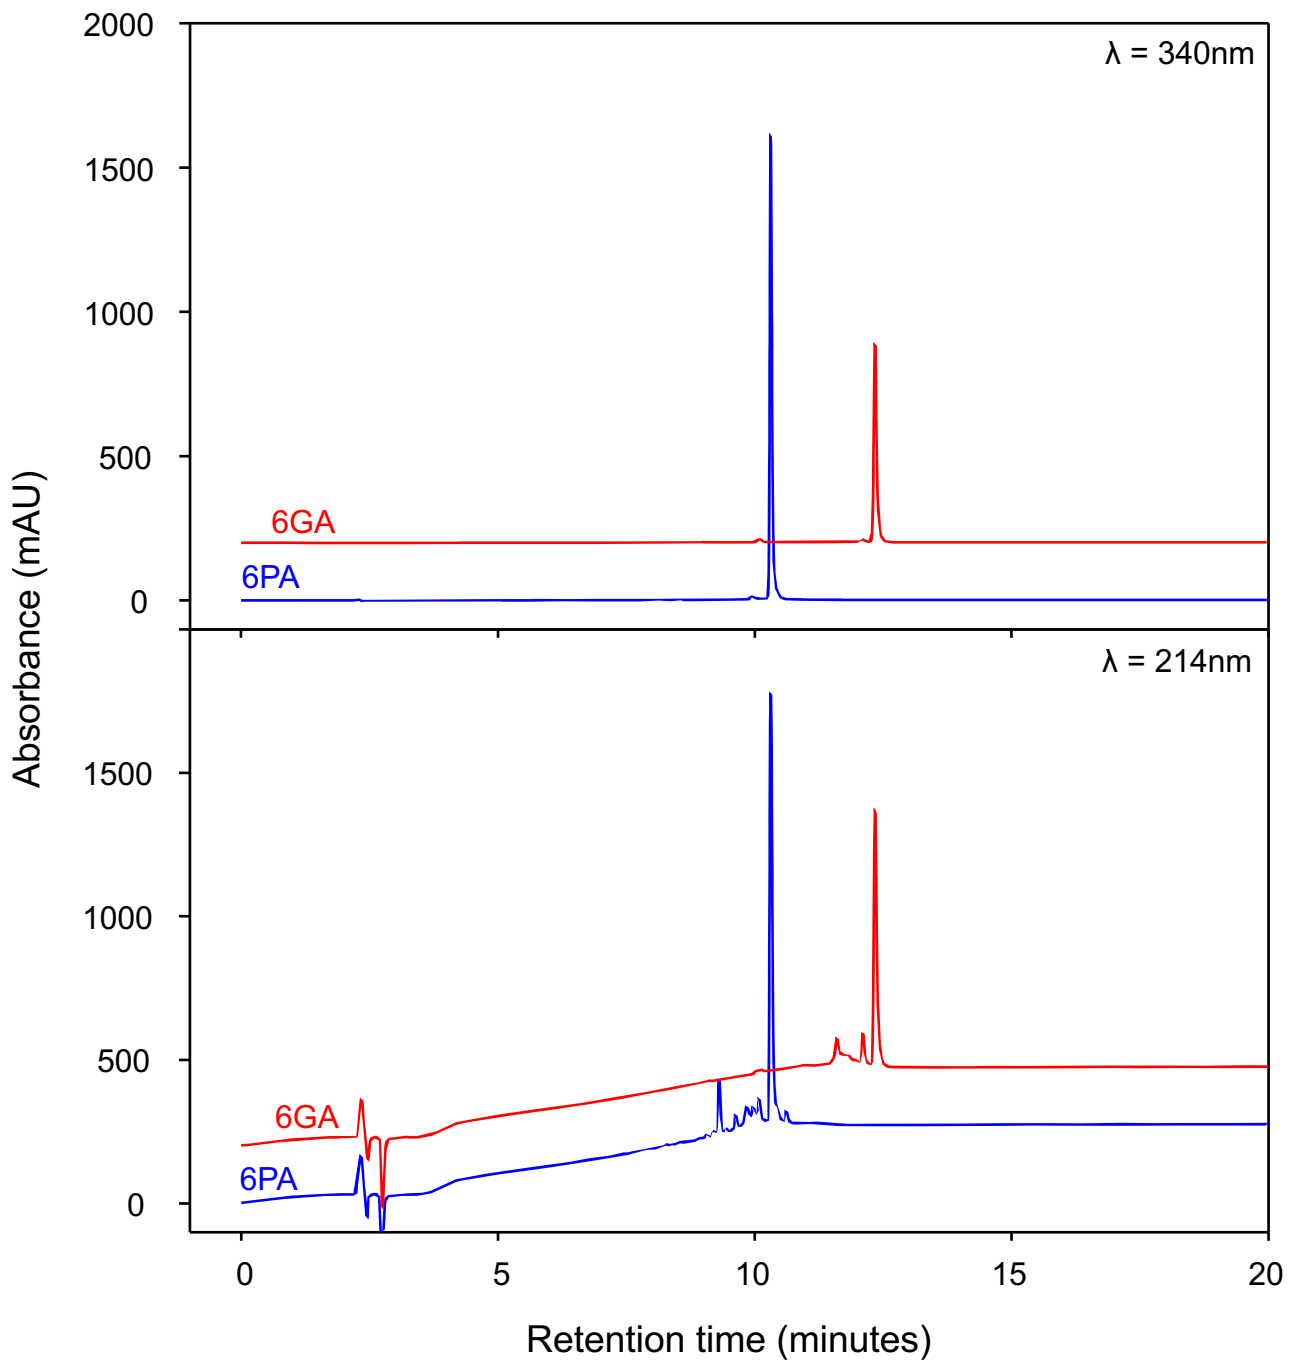

**Supplemental Figure 1. Representative HPLC chromatograms of purified 6-PA and 6-GA.** Chromatograms were extracted at 340 nm (*upper panel*) and 214 nm (*lower panel*) from purified 6-PA and 6-GA fractions from a polyphenol-enriched *C. sativa* extract.

>ATGGTGTTCTCATCAGTTTGTAGTTTTCCATCCTCCCTTGGAACATAATTTTAAATTAGTTCCTC  
GTAGTAATTTAAGGCATCATCTTCTCATTATCATGAAATAAATAATTTTATTAATAATAAACCAATT  
AAATTCTCATATTTTTCTTCAAGACTATATTGCTCTGCCAAACCAATTGTACACAGAGAAAACAA  
ATTCACAAAATCATTTTCACTCAGCCACCTCCAAAGGAAAAGCTCCATAAAGGCACATGGTGA  
AATTGAAGCTGATGGGAGTAATGGCACATCTGAATTTAATGTAATGAAAAGTGGAAACGCAATT  
TGGAGATTTGTAAGGCCATATGCAGCCAAGGGAGTATTGTTTAACTCTGCTGCTATGTTTGCA  
AAAGAGTTGGTGGGGAACCTAAATCTATTTAGTTGGCCTTTGATGTTTAAAGATACTCTCTTTTA  
CATTGGTTATTTTATGCATTTTTGTAAGTACAAGTGGCATCAATCAAATTTATGATCTCGACATC  
GACAGGTTAAACAAACCTAATTTGCCAGTAGCATCAGGAGAAATTTAGTTGAATTGGCATGG  
TTGTTGACTATAGTTTGTACAATAAGTGGCCTCACATTAACAATTATAACGAACTCAGGGCCATT  
CTTCCCTTTTCTCTACTCTGCTAGTATCTTTTTTGGCTTTCTCTATTCTGCTCCTCCATTCAGAT  
GGAAGAAGAATCCTTTTACAGCATGTTTCTGTAATGTTATGTTGTATGTTGGCACAAGCGTTGG  
TGTCTATTATGCTTGTAAGGCTAGTCTCGGGCTTCCAGCCAACCTGGAGCCCTGCTTTTTGTTT  
GCTCTTTTGGTTTATTTTATTGTTGAGTATACCCATCTCCATTGCAAAAGATCTTTCAGACATAG  
AAGGTGACCGCAAGTTTGAATCATAACCTTCTCAACTAAATTTGGAGCAAAACCCATAGCATA  
TATTTGTCATGGACTCATGCTTCTGAATTACGTGAGTGTTATGGCTGCAGCTATTATTTGGCCA  
CAGTTTTTCAACAGTAGCGTAATATTGCTTTCTCATGCATTCATGGCAATTTGGGTATTATATCA  
GGCTTGGATATTGGAGAAATCAAATTACGCCACGGAGACGTGCCAAAATACTATATATTCCTT  
TGGATAATTTTTTCTCTTGAACATGCCTTCTATTTGTTTCATGTAG

**Supplemental Figure 2. cDNA coding sequence of *CsPT3*.**

<sup>1</sup>H NMR  
Sample "6-prenyl apigenin" in acetone-d<sub>6</sub>

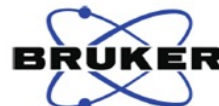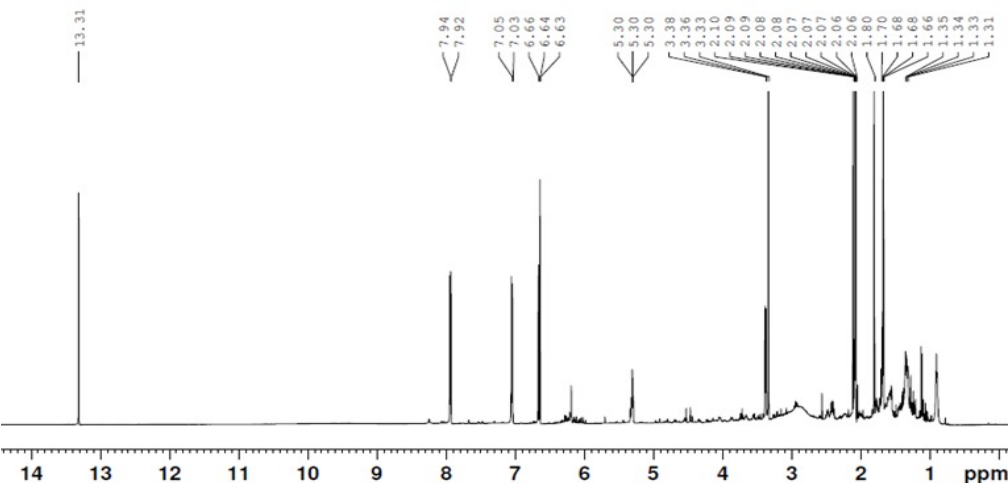

```
Current Data Parameters
NAME      20250530_Eric_CFB
EXPNO    12
PROCNO   1

F2 - Acquisition Parameters
Date_    20250530
Time     14:15
INSTRUM  spect
PROBHD   5mm QNP1H
PULPROG  zgpg30
TD       65536
SOLVENT  Acetone
NS       65
DS       4
SWH      10779.862 Hz
FIDRES   0.328853 Hz
AQ       3.0489704 sec
RG       39.44
CW       48.400 umsec
DE       25.63 umsec
TE       298.2 K
D1       10.00000000 sec
TSD
SFO1     599.8837050 MHz
NUC1     1H
PC       2.67 umsec
D11      8.00 umsec
PDM1     5.714799888 W

F2 - Processing parameters
SI       32768
SF       599.8800000 MHz
WDW      EM
SSB      0
LB       0.10 Hz
GB       0
CB       0
PC       1.00
```

**Supplemental Figure 3: The <sup>1</sup>H NMR spectrum for compound 1.** Compound 1 was extracted from *Cannabis sativa* and analyzed in acetone-d<sub>6</sub> at 600 MHz. Chemical shift assignments are in excellent agreement with those previously reported for 6-prenylapigenin (6-dimethylallylapigenin) (Delle Monache et al. 1994; Li et al. 2014).

<sup>1</sup>H NMR  
Sample "6-geranyl apigenin" in dms0-d6

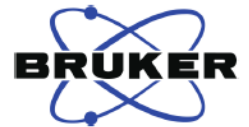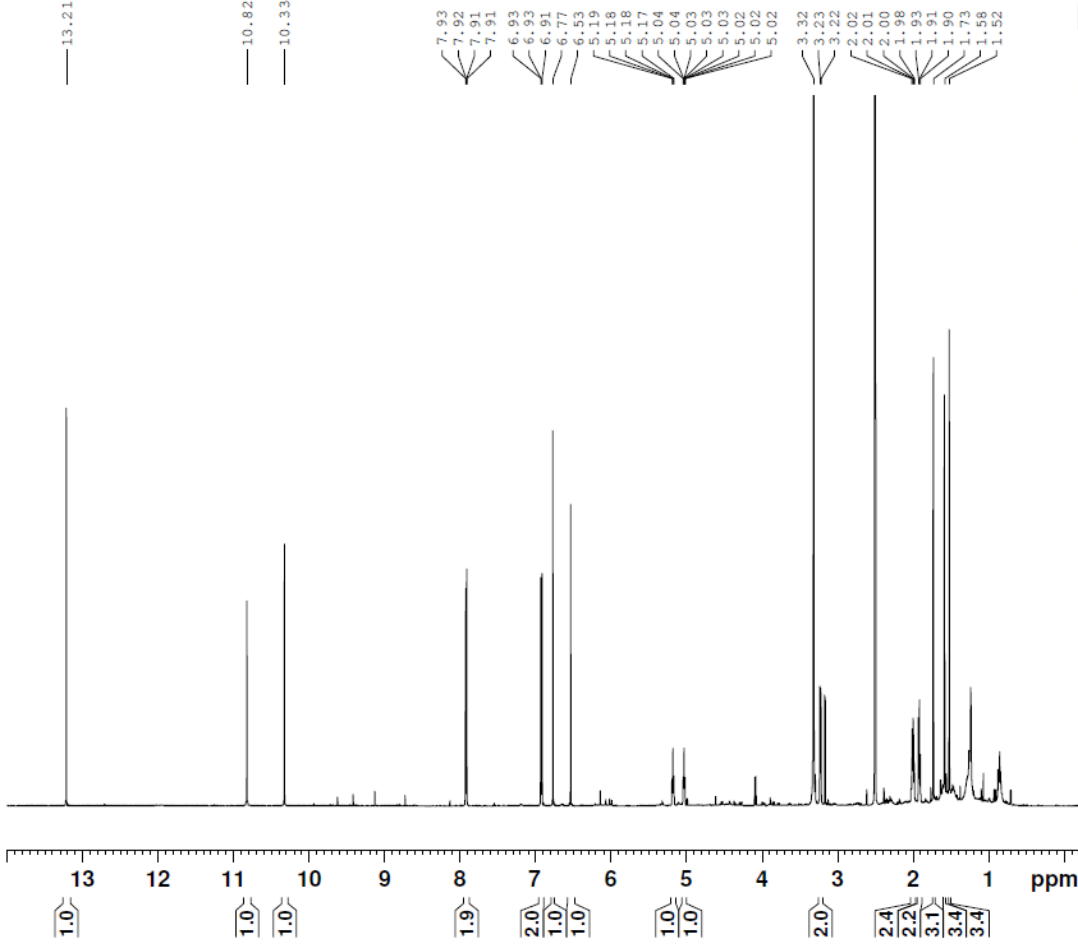

```
Current Data Parameters
NAME: 20250330_Eric_apigenin
EXPNO: 21
PROCNO: 1

F2 - Acquisition Parameters
Date_   20250704
Time    5.40
INSTRUM spect
PROBHD  X75812_0040 (CP TCI 600S3 H-C/N-D-05 Z)
PULPROG zgpg30
TD      65536
SOLVENT DMSO
NS      24
DS      0
SWH     10775.862 Hz
FIDRES  0.328853 Hz
AQ      3.0408704 sec
RG      336.84
DM      46.400 umsec
DE      25.44 umsec
TE      298.2 K
D1      10.00000000 sec
TDO     .
SFO1    599.8837050 MHz
NUC1    1H
PC      2.44 umsec
PI      7.92 umsec
PLM1    5.71479988 W

F2 - Processing parameters
```

**Supplemental Figure 4. The <sup>1</sup>H NMR spectrum for compound 2.** Compound 2 extracted from *Cannabis sativa* (analyzed in DMSO-*d*<sub>6</sub>, at 600 MHz). Chemical shift assignments are in excellent agreement with those previously reported for 6-geranylapigenin (Kumano et al. 2008).

# Normal Q-Q Plot

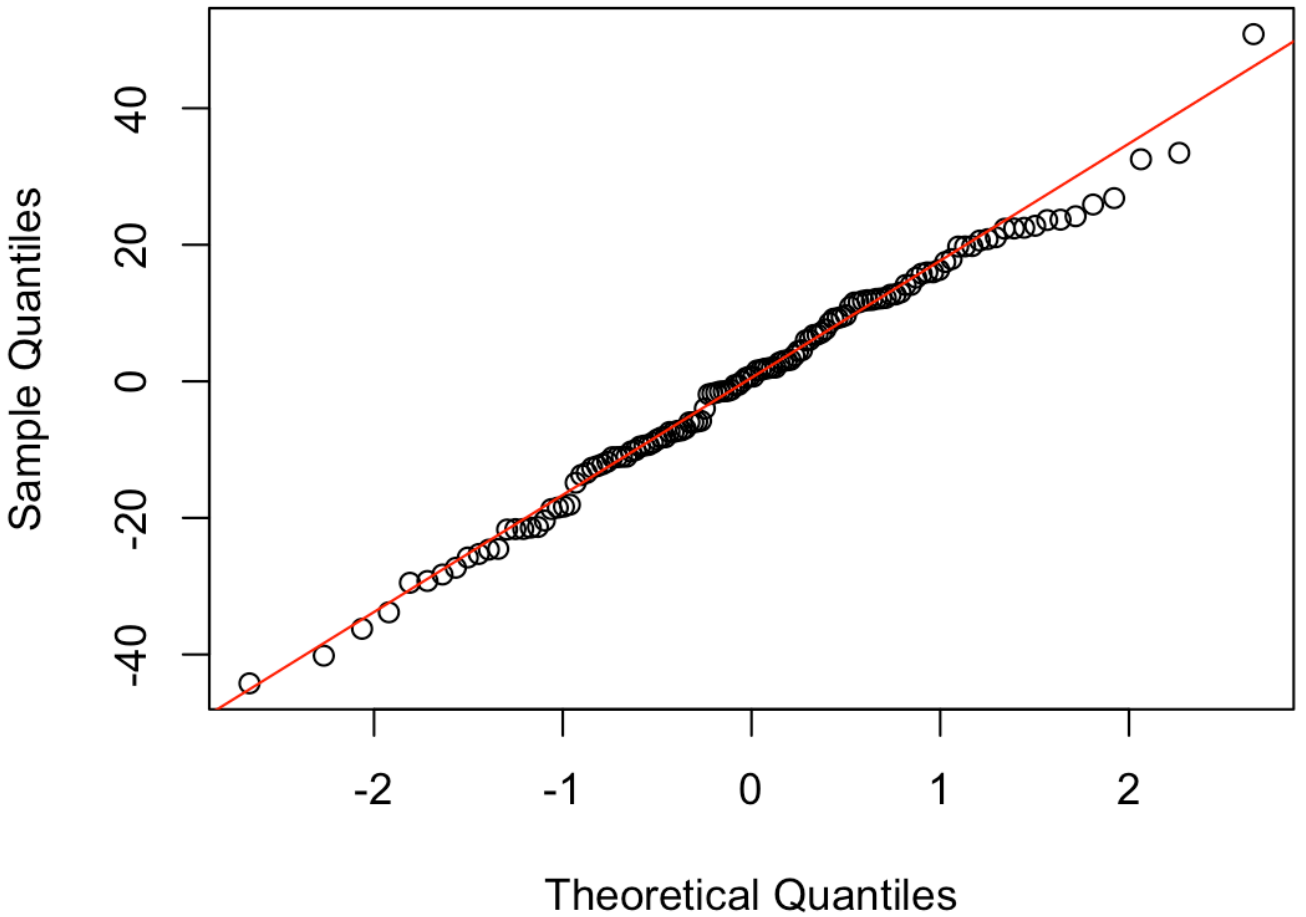

**Supplemental Figure 5. A normal Q–Q plot generated from linear regression model.** Residuals exhibit a relatively straight line, suggesting the linear regression model used satisfied the assumption of normality of residuals.

## Residuals vs Fitted

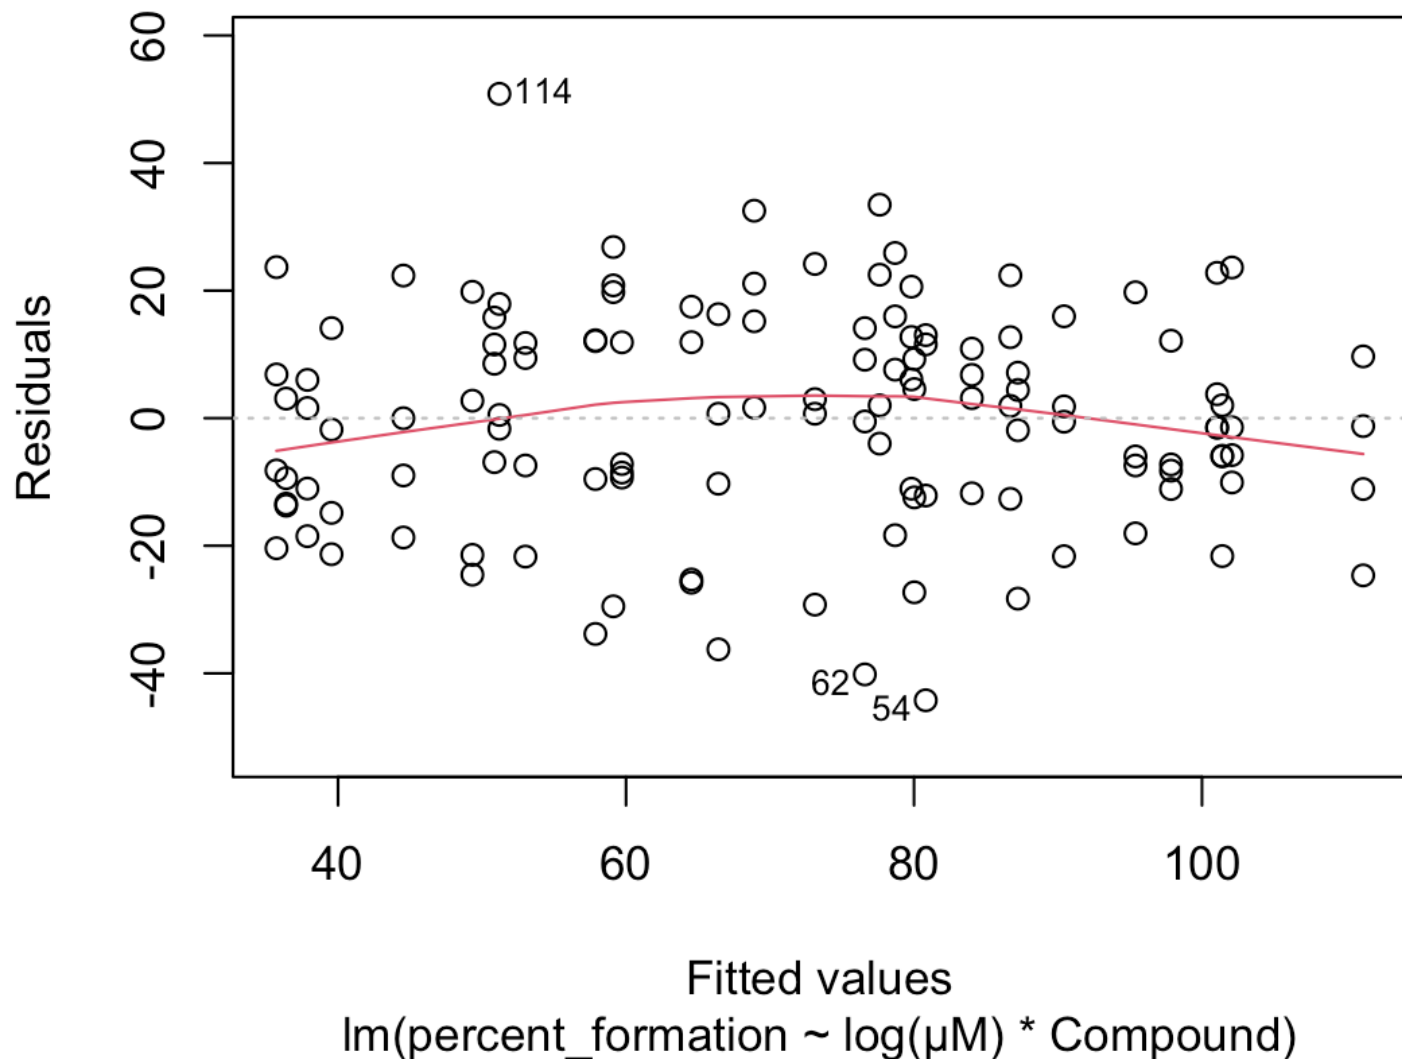

**Supplemental Figure 6. Residuals vs fitted values plot.** Plot shows the LOESS curve is nearly flat and absent of any strong curve, suggesting the linear regression model used satisfied the assumption of linearity. The plot's vertical spread of residuals is relatively uniform; no sections have an abnormally high variance which therefore satisfies the assumption of homoscedasticity.

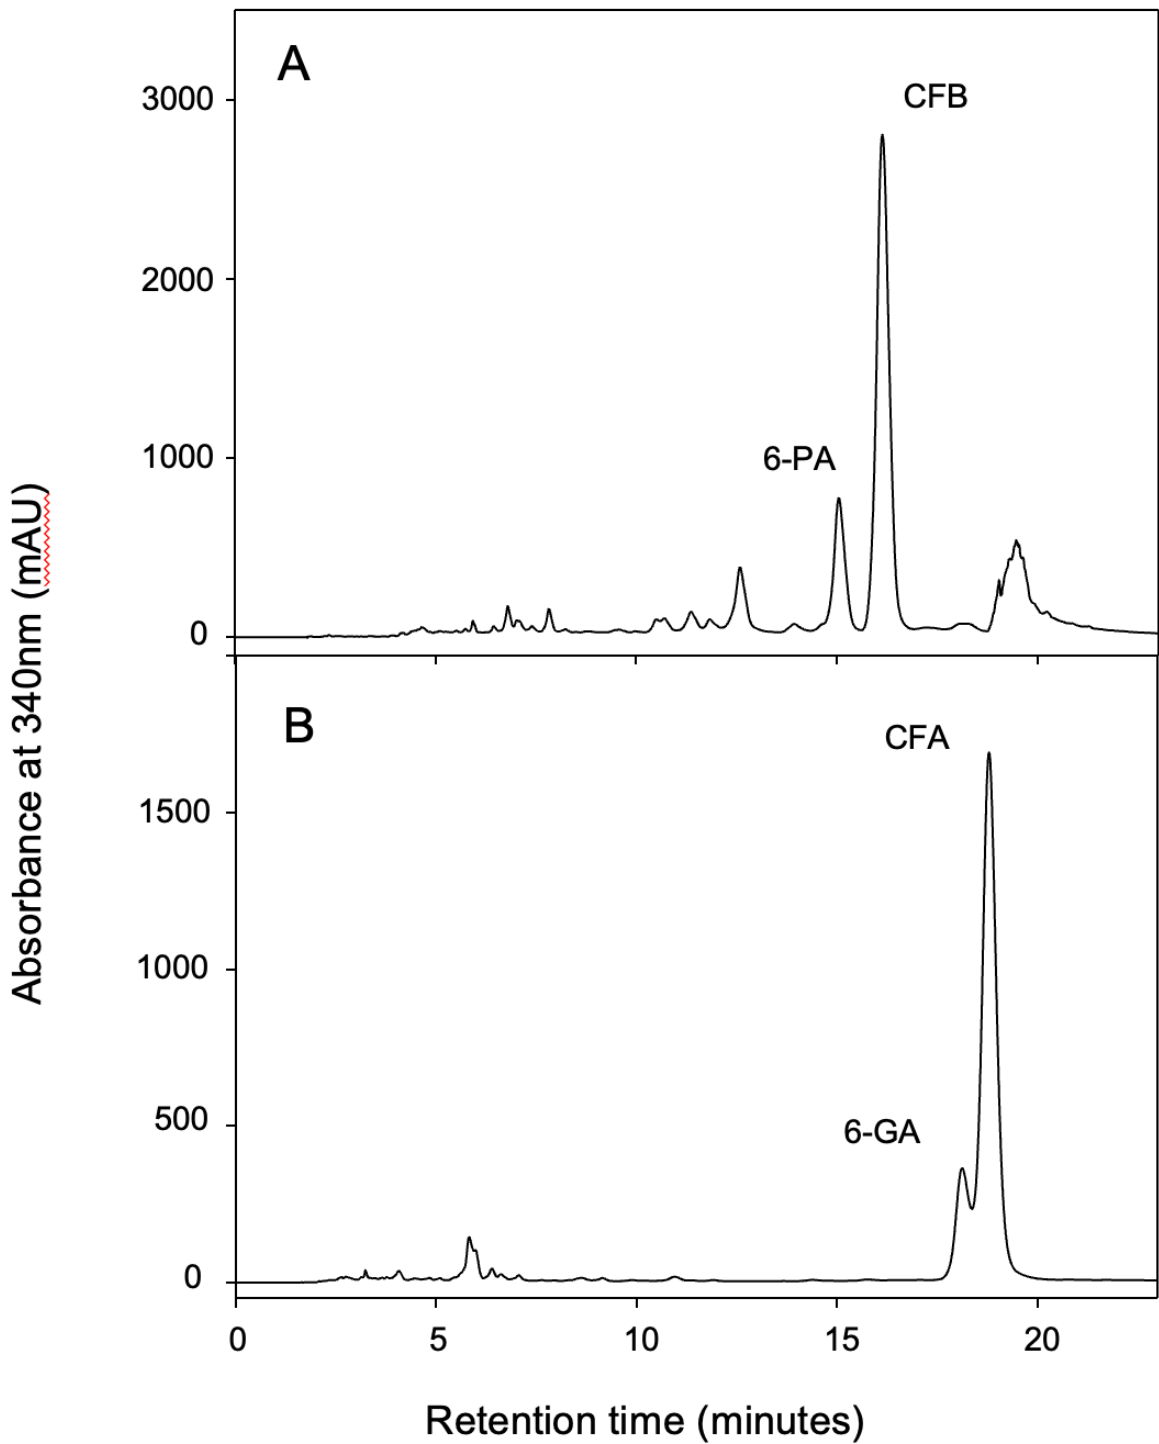

**Supplemental Figure 7. Preparative HPLC chromatograms of semi-purified cannflavin B and A extracts.** Using the analytical methods described below, compounds 1 (A) and 2 (B) were consistently observed to elute immediately before the cannflavins, CFA and CFB.

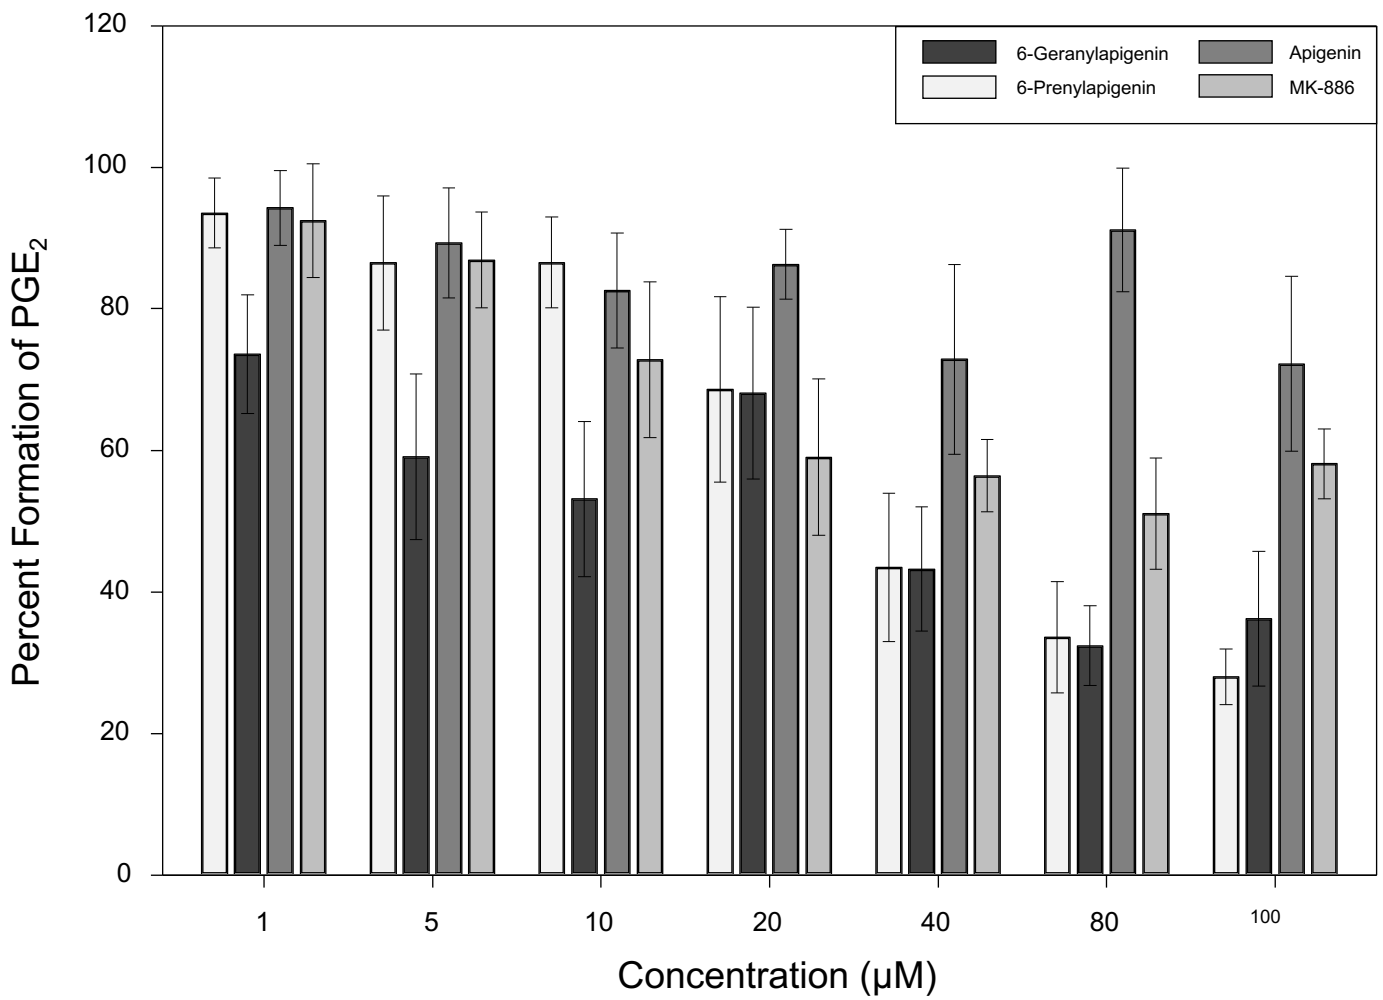

**Supplemental Figure 8. Inhibition of mPGES-1 activity by 6-PA and 6-GA.** Data show the percent formation of PGE<sub>2</sub> by mPGES-1 in the presence of 6-PA, 6-GA, apigenin, or MK-886. Data are the means of four independent experiments; error bars depict the standard error.

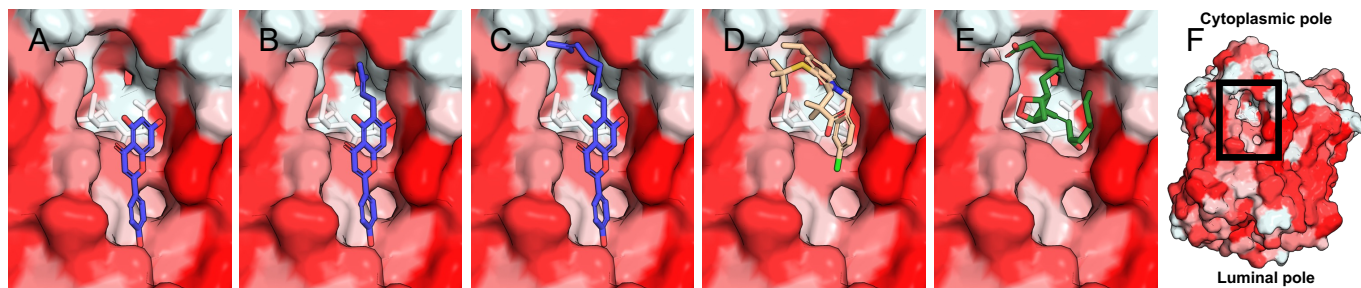

**Supplemental Figure 9. In silico docking poses of selected ligands within the mPGES-1 active site.** Protein is shown as a surface representation and coloured according to the Eisenberg hydrophobicity scale (red = greater hydrophobicity). The GSH cofactor is shown in white. Ligands are coloured by atom type (C = blue; Cl = lime green; O = red; N = blue; S = yellow). (A) apigenin. (B) 6-PA. (C) 6-GA. (D) MK-886 (beige). (E) prostaglandin H<sub>2</sub> (green). (F) overall structure of the mPGES-1 homotrimer with the ligand active site (black box) and the cytoplasmic and luminal poles indicated. (Refer to the online version of this article to interpret colour references in the figure legend.)

| Explanatory Variable | $\beta_0$ | $\beta_1$ | Std. error ( $\beta_0$ ) | Std. error ( $\beta_1$ ) | $p$ value ( $\beta_0$ ) | $p$ value ( $\beta_1$ ) |
|----------------------|-----------|-----------|--------------------------|--------------------------|-------------------------|-------------------------|
| MK-886               | 95.3796   | -9.6681   | 4.9987                   | 1.6736                   | $<2 \times 10^{-16}$    | $6.12 \times 10^{-8}$   |
| Apigenin             | 2.4687    | 5.0508    | 7.0692                   | 2.3668                   | 0.7275                  | 0.0349                  |
| 6-Prenylapigenin     | 6.0283    | -4.4493   | 7.0692                   | 2.3668                   | 0.3955                  | 0.0626                  |
| 6-Geranylapiogenin   | -15.3570  | 0.0491    | 7.0692                   | 2.3668                   | 0.0318                  | 0.9835                  |

Multiple  $R^2 = 0.6172$

Adjusted multiple  $R^2 = 0.5949$

**Supplemental Figure 10. Summary Statistics for Linear Regression Model.** Regression coefficients ( $\beta_0$  and  $\beta_1$ ) with associated standard errors and  $p$  values for each explanatory variable (compound). Model fit statistics (multiple  $R^2$  and adjusted multiple  $R^2$  values) are also reported.
